# Supplementary material
Source: publisher figshare collection journal article supplement (https://acs.figshare.com/ndownloader/files/3843637)
Supplement: Supplementary file 1 [file 3843637]

## Supporting Information

### Oscillatory Electro-oxidation of Methanol on Nanoarchitected Pt<sub>pc</sub>/Rh/Pt Metallic Multilayer

R. Nagao,<sup>1,2,†</sup> R. G. Freitas,<sup>1,3</sup> C. D. Silva,<sup>1</sup> H. Varela,<sup>2,4</sup> E. C. Pereira<sup>1,\*</sup>

<sup>1</sup>*Department of Chemistry, Federal University of São Carlos,  
POBox 676, 13565-905, São Carlos, SP, Brazil.*

<sup>2</sup>*Institute of Chemistry of São Carlos, University of São Paulo,  
POBox 780, 13560-970, São Carlos, SP, Brazil.*

<sup>3</sup>*Department of Chemistry, Federal Univeristy of Mato Grosso,  
POBox 78060-900, Cuiaba, MT, Brazil.*

<sup>4</sup>*Ertl Center for Electrochemistry and Catalysis, GIST,  
Cheomdan-gwagiro 261, Buk-gu, Gwangju 500-712, South Korea.*

*\*corresponding author: ernesto@ufscar.br (ECP).*

*†current address: Department of Chemistry, Saint Louis University, 3501 Laclede Ave.,  
St. Louis, MO 63103, USA.*

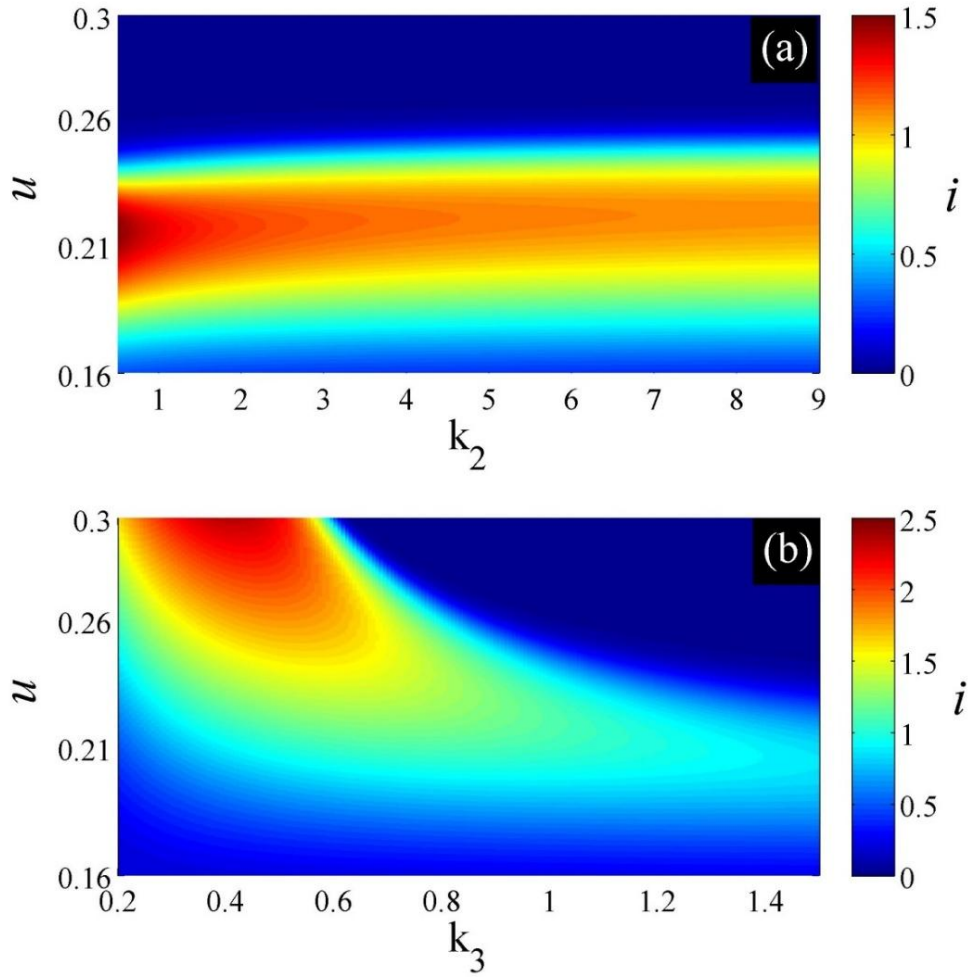

**Figure S1.** Effect of reaction rate constant (a)  $k_2$  at  $k_3 = 1.0$  and (b)  $k_3$  at  $k_2 = 5.0$  on the calculated current (color map) with  $du/dt = 0.01$ ,  $x_1(0) = -0.3$  and  $x_4(0) = 0.9$ . Additional parameters are:  $k_1 = 6.0$ ,  $k_4 = 4.0$ ,  $k_5 = 0.079$ ,  $k_6 = 50$ ,  $k_7 = 600$ ,  $k_8 = 30$ ,  $k_9 = 300$ ,  $k_{10} = 0.1$ ,  $\omega = 15$ ,  $r = 0.05$ .

**Table S1.** (a)  $\Delta U_m \Delta \text{cycles}^{-1} / \text{mV} \cdot \text{cycle}^{-1}$ , (b)  $U_{m,\text{max}} / \text{V}$ , (c) total # of cycles. All parameters were measured experimentally.

| $j / \text{mA cm}^{-2}$ | $\text{Pt}_{\text{pc}}$ |       |     | $\text{Pt}_{\text{pc}}/\text{Rh}_{2.0}/\text{Pt}_{1.0}$ |       |     |
|-------------------------|-------------------------|-------|-----|---------------------------------------------------------|-------|-----|
|                         | (a)                     | (b)   | (c) | (a)                                                     | (b)   | (c) |
| 0.32                    | 0.130                   | 0.792 | 669 | 0.047                                                   | 0.705 | 590 |
| 0.48                    | 0.190                   | 0.802 | 502 | 0.117                                                   | 0.725 | 406 |
| 0.64                    | 0.227                   | 0.773 | 297 | 0.162                                                   | 0.723 | 384 |
| 0.81                    | 0.395                   | 0.760 | 140 | 0.169                                                   | 0.723 | 232 |

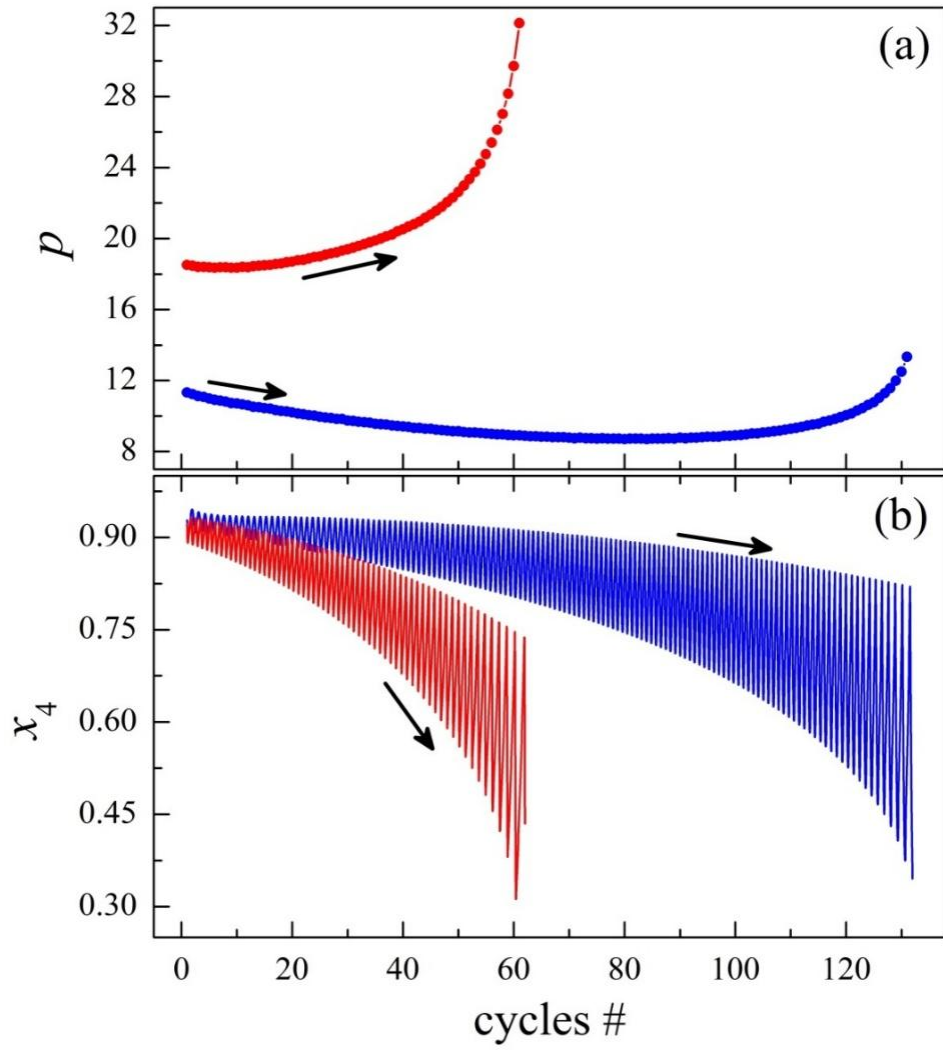

**Figure S2.** Simulated period and adsorbed CO coverage during potential oscillations in the electro-oxidation of methanol.  $k_2 = 5.0$  for blue curves and  $k_2 = 1.0$  for red ones. The black arrows indicate the direction of increasing the number of cycles from initial  $i$  of  $0.05$  and drift of  $2.00 \times 10^{-3}$ . Additional parameters are:  $k_1 = 6.0$ ,  $k_3 = 1.0$ ,  $k_4 = 4.0$ ,  $k_5 = 0.079$ ,  $k_6 = 50$ ,  $k_7 = 600$ ,  $k_8 = 30$ ,  $k_9 = 300$ ,  $k_{10} = 0.1$ ,  $\omega = 15$ .
